# Supplementary material
Source: Springer Nature journal article supplement (https://www.springermedizin.de/resource/supplementary/12990_2007_93_MOESM3_ESM.pdf/9612552)

# Single-Dose Tolerance Effect of Dose Interval

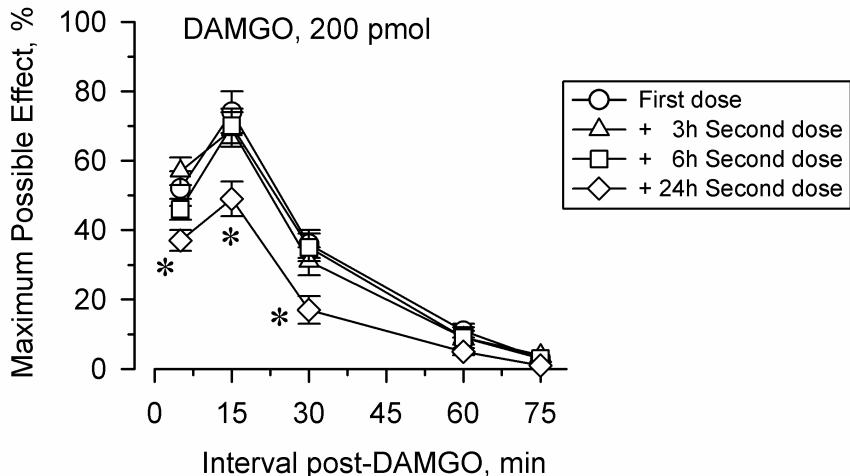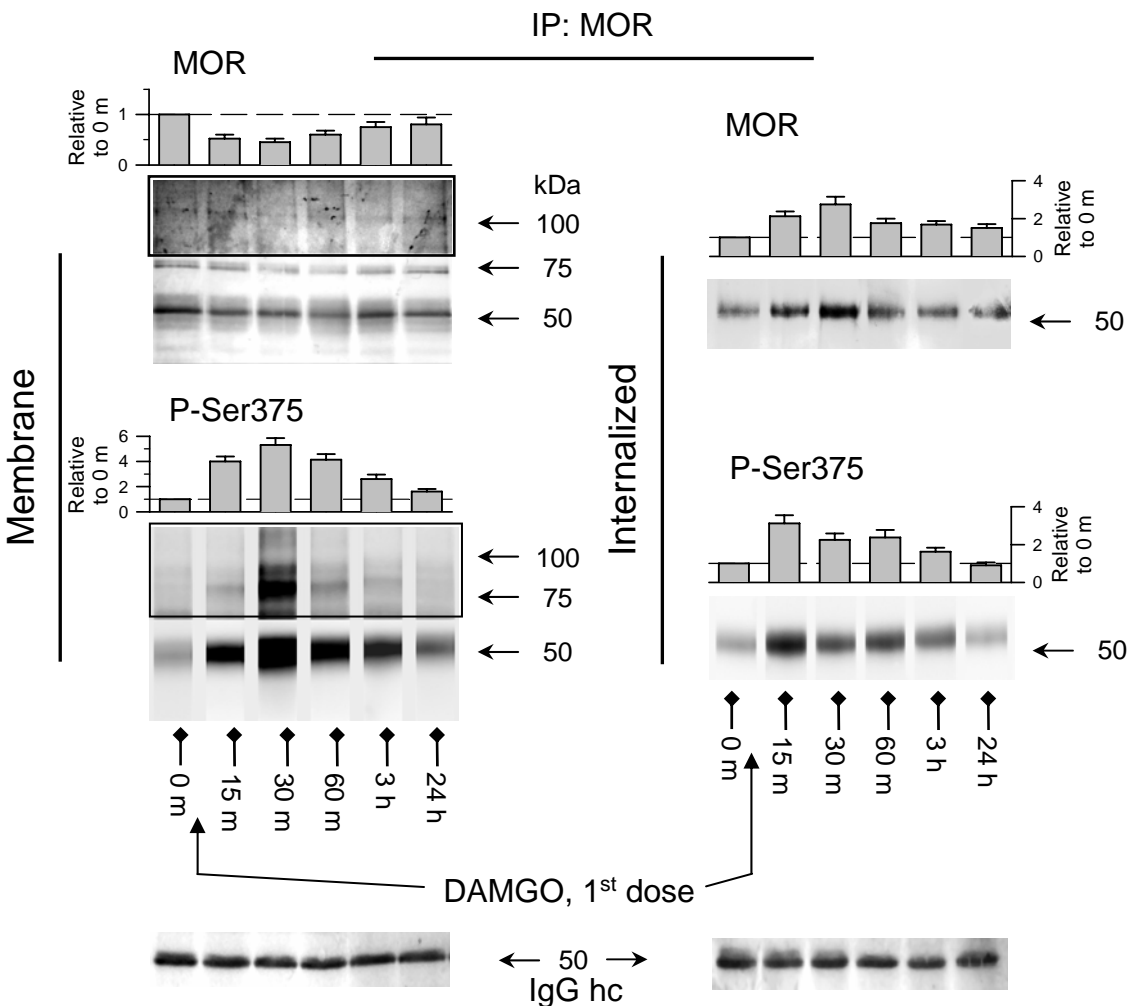

## Internalized MORs co-precipitate:

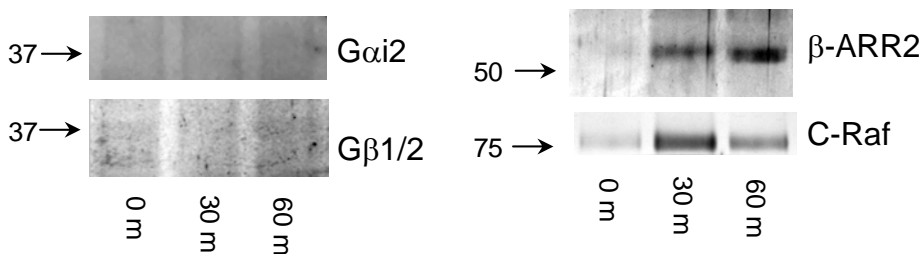

Supplement: MOESM3 [file 9612552]
